# Supplementary material for: Computational Fact Checking from Knowledge Networks
Source: PubMed Central journal article supplement (PMC4471100; doi:10.1371/journal.pone.0128193), 2015-06-17
Supplement: pone.0128193.s001.pdf [file pone.0128193.s001.pdf]

# Computational fact checking from knowledge networks: Supporting Information

Giovanni Luca Ciampaglia\*, Prashant Shiralkar, Luis M. Rocha,  
Johan Bollen, Filippo Menczer, Alessandro Flammini

## Data tables for Fig. 3

Table 1: Oscars for Best Movie

| Year    | Movie                            | Director              |
|---------|----------------------------------|-----------------------|
| 1927-28 | Seventh Heaven                   | Frank Borzage         |
| 1927-28 | Two Arabian Knights              | Lewis Milestone       |
| 1928-29 | The Divine Lady                  | Frank Lloyd           |
| 1934    | It Happened One Night            | Frank Capra           |
| 1935    | The Informer                     | John Ford             |
| 1937    | The Awful Truth                  | Leo McCarey           |
| 1939    | Gone with the Wind               | Victor Fleming        |
| 1942    | Mrs Miniver                      | William Wyler         |
| 1943    | Casablanca                       | Michael Curtiz        |
| 1945    | The Lost Weekend                 | Billy Wilder          |
| 1948    | The Treasure of the Sierra Madre | John Huston           |
| 1949    | A Letter to Three Wives          | Joseph L. Mankiewicz  |
| 1951    | A Place in the Sun               | George Stevens        |
| 1953    | From Here to Eternity            | Fred Zinnemann        |
| 1954    | On the Waterfront                | Elia Kazan            |
| 1955    | Marty                            | Delbert Mann          |
| 1957    | The Bridge on the River Kwai     | David Lean            |
| 1958    | Gigi                             | Vincente Minnelli     |
| 1964    | My Fair Lady                     | George Cukor          |
| 1967    | The Graduate                     | Mike Nichols          |
| 1968    | Oliver                           | Carol Reed            |
| 1969    | Midnight Cowboy                  | John Schlesinger      |
| 1970    | Patton                           | Franklin J. Schaffner |
| 1971    | The French Connection            | William Friedkin      |
| 1973    | The Sting                        | George Roy Hill       |
| 1974    | The Godfather Part II            | Francis Ford Coppola  |
| 1976    | Rocky                            | John G. Avildsen      |

\*Corresponding author. Email: gciampag@indiana.edu

Table 1 – continued from previous page

| Year | Movie                                        | Director             |
|------|----------------------------------------------|----------------------|
| 1977 | Annie Hall                                   | Woody Allen          |
| 1978 | The Deer Hunter                              | Michael Cimino       |
| 1979 | Kramer vs Kramer                             | Robert Benton        |
| 1980 | Ordinary People                              | Robert Redford       |
| 1981 | Reds                                         | Warren Beatty        |
| 1982 | Gandhi                                       | Richard Attenborough |
| 1983 | Terms of Endearment                          | James L. Brooks      |
| 1984 | Amadeus                                      | Miloš Forman         |
| 1985 | Out of Africa                                | Sydney Pollack       |
| 1986 | Platoon                                      | Oliver Stone         |
| 1987 | The Last Emperor                             | Bernardo Bertolucci  |
| 1988 | Rain Man                                     | Barry Levinson       |
| 1990 | Dances with Wolves                           | Kevin Costner        |
| 1991 | The Silence of the Lambs                     | Jonathan Demme       |
| 1992 | Unforgiven                                   | Clint Eastwood       |
| 1994 | Forrest Gump                                 | Robert Zemeckis      |
| 1995 | Braveheart                                   | Mel Gibson           |
| 1996 | The English Patient                          | Anthony Minghella    |
| 1997 | Titanic                                      | James Cameron        |
| 1998 | Saving Private Ryan                          | Steven Spielberg     |
| 1999 | American Beauty                              | Sam Mendes           |
| 2000 | Traffic                                      | Steven Soderbergh    |
| 2001 | A Beautiful Mind                             | Ron Howard           |
| 2002 | The Pianist                                  | Roman Polanski       |
| 2003 | The Lord of the Rings The Return of the King | Peter Jackson        |
| 2005 | Brokeback Mountain                           | Ang Lee              |
| 2006 | The Departed                                 | Martin Scorsese      |
| 2007 | No Country for Old Men                       | Joel and Ethan Coen  |
| 2008 | Slumdog Millionaire                          | Danny Boyle          |
| 2009 | The Hurt Locker                              | Kathryn Bigelow      |
| 2011 | The Artist                                   | Michel Hazanavicius  |
| 2013 | Gravity                                      | Alfonso Cuarón       |

Table 2: Spouses of US Presidents

| President |                       | Spouse |                            |
|-----------|-----------------------|--------|----------------------------|
| WW        | Woodrow Wilson        | EBGW   | Edith Bolling Galt Wilson  |
| WGH       | Warren G. Harding     | FH     | Florence Harding           |
| CC        | Calvin Coolidge       | GC     | Grace Coolidge             |
| HH        | Herbert Hoover        | LHH    | Lou Henry Hoover           |
| FDR       | Franklin D. Roosevelt | ER     | Eleanor Roosevelt          |
| HST       | Harry S. Truman       | BT     | Bess Truman                |
| DDE       | Dwight D. Eisenhower  | ME     | Mamie Eisenhower           |
| JFK       | John F. Kennedy       | JKO    | Jacqueline Kennedy Onassis |
| LBJ       | Lyndon B. Johnson     | LBJ    | Lady Bird Johnson          |
| RN        | Richard Nixon         | PN     | Pat Nixon                  |
| GF        | Gerald Ford           | BF     | Betty Ford                 |
| JC        | Jimmy Carter          | RC     | Rosalynn Carter            |
| RR        | Ronald Reagan         | NR     | Nancy Reagan               |
| GHWB      | George H. W. Bush     | BB     | Barbara Bush               |
| BC        | Bill Clinton          | HRC    | Hillary Rodham Clinton     |
| GWB       | George W. Bush        | LB     | Laura Bush                 |
| BO        | Barack Obama          | MO     | Michelle Obama             |

Table 3: US state capitals

| Region     | Capital        | State             |
|------------|----------------|-------------------|
| Midwest    | Springfield    | Illinois          |
|            | Indianapolis   | Indiana           |
|            | Des Moines     | Iowa              |
|            | Topeka         | Kansas            |
|            | Lansing        | Michigan          |
|            | Saint Paul     | Minnesota         |
|            | Jefferson City | Missouri          |
|            | Lincoln        | Nebraska          |
|            | Bismarck       | North Dakota      |
|            | Columbus       | Ohio              |
|            | Pierre         | South Dakota      |
|            | Madison        | Wisconsin         |
| Northeast  | Hartford       | Connecticut       |
|            | Augusta        | Maine             |
|            | Boston         | Massachusetts     |
|            | Concord        | New Hampshire     |
|            | Trenton        | New Jersey        |
|            | Albany         | New York          |
|            | Harrisburg     | Pennsylvania      |
|            | Providence     | Rhode Island      |
|            | Montpelier     | Vermont           |
| South      | Montgomery     | Alabama           |
|            | Little Rock    | Arkansas          |
|            | Dover          | Delaware          |
|            | Tallahassee    | Florida           |
|            | Atlanta        | Georgia U S state |
|            | Frankfort      | Kentucky          |
|            | Baton Rouge    | Louisiana         |
|            | Annapolis      | Maryland          |
|            | Jackson        | Mississippi       |
|            | Raleigh        | North Carolina    |
|            | Oklahoma City  | Oklahoma          |
|            | Columbia       | South Carolina    |
|            | Nashville      | Tennessee         |
|            | Austin         | Texas             |
| Richmond   | Virginia       |                   |
| Charleston | West Virginia  |                   |
| West       | Juneau         | Alaska            |
|            | Phoenix        | Arizona           |
|            | Sacramento     | California        |
|            | Honolulu       | Hawaii            |
|            | Boise          | Idaho             |
|            | Helena         | Montana           |
|            | Carson City    | Nevada            |
|            | Santa Fe       | New Mexico        |

Table 3 – continued from previous page

| Region | Capital        | State   |
|--------|----------------|---------|
|        | Salem          | Oregon  |
|        | Salt Lake City | Utah    |
|        | Cheyenne       | Wyoming |

Table 4: World country capitals

| Region                | Capital                          | State          |
|-----------------------|----------------------------------|----------------|
| Africa                | Angola                           | Luanda         |
|                       | Angola                           | Luanda         |
|                       | Benin                            | Porto-Novo     |
|                       | Botswana                         | Gaborone       |
|                       | Burkina Faso                     | Ouagadougou    |
|                       | Burundi                          | Bujumbura      |
|                       | Cameroon                         | Yaoundé        |
|                       | Cape Verde                       | Praia          |
|                       | Central African Republic         | Bangui         |
|                       | Comoros                          | Moroni Comoros |
|                       | Democratic Republic of the Congo | Kinshasa       |
|                       | Republic of the Congo            | Brazzaville    |
|                       | Djibouti                         | Djibouti       |
|                       | Egypt                            | Cairo          |
|                       | Equatorial Guinea                | Malabo         |
|                       | Eritrea                          | Asmara         |
|                       | Ethiopia                         | Addis Ababa    |
|                       | Gabon                            | Libreville     |
|                       | The Gambia                       | Banjul         |
|                       | Ghana                            | Accra          |
|                       | Guinea                           | Conakry        |
|                       | Guinea Bissau                    | Bissau         |
|                       | Kenya                            | Nairobi        |
|                       | Lesotho                          | Maseru         |
|                       | Liberia                          | Monrovia       |
|                       | Libya                            | Tripoli        |
|                       | Madagascar                       | Antananarivo   |
|                       | Malawi                           | Lilongwe       |
|                       | Mali                             | Bamako         |
|                       | Mauritania                       | Nouakchott     |
|                       | Mauritius                        | Port Louis     |
|                       | Morocco                          | Rabat          |
|                       | Mozambique                       | Maputo         |
|                       | Namibia                          | Windhoek       |
| Niger                 | Niamey                           |                |
| Nigeria               | Abuja                            |                |
| Rwanda                | Kigali                           |                |
| São Tomé and Príncipe | São Tomé                         |                |
| Senegal               | Dakar                            |                |
| Seychelles            | Victoria Seychelles              |                |
| Sierra Leone          | Freetown                         |                |
| Somalia               | Mogadishu                        |                |
| South Africa          | Pretoria                         |                |
| South Sudan           | Juba                             |                |
| Sudan                 | Khartoum                         |                |

Table 4 – continued from previous page

| Region | Capital            | State               |
|--------|--------------------|---------------------|
|        | Swaziland          | Mbabane             |
|        | Tanzania           | Dodoma              |
|        | Togo               | Lomé                |
|        | Tunisia            | Tunis               |
|        | Uganda             | Kampala             |
|        | Zambia             | Lusaka              |
|        | Zimbabwe           | Harare              |
|        | Afghanistan        | Kabul               |
|        | Armenia            | Yerevan             |
|        | Azerbaijan         | Baku                |
|        | Bahrain            | Manama              |
|        | Bangladesh         | Dhaka               |
|        | Bhutan             | Thimphu             |
|        | Brunei             | Bandar Seri Begawan |
|        | Burma              | Naypyidaw           |
|        | Cambodia           | Phnom Penh          |
|        | China              | Beijing             |
|        | Cyprus             | Nicosia             |
|        | East Timor         | Dili                |
|        | Georgia country    | Tbilisi             |
|        | India              | New Delhi           |
|        | Indonesia          | Jakarta             |
|        | Iran               | Tehran              |
|        | Iraq               | Baghdad             |
|        | Israel             | Jerusalem           |
|        | Japan              | Tokyo               |
|        | Jordan             | Amman               |
|        | Kazakhstan         | Astana              |
|        | North Korea        | Pyongyang           |
|        | South Korea        | Seoul               |
| Asia   | Kuwait             | Kuwait City         |
|        | Kyrgyzstan         | Bishkek             |
|        | Laos               | Vientiane           |
|        | Lebanon            | Beirut              |
|        | Malaysia           | Kuala Lumpur        |
|        | Maldives           | Malé                |
|        | Mongolia           | Ulan Bator          |
|        | Nepal              | Kathmandu           |
|        | Oman               | Muscat Oman         |
|        | Pakistan           | Islamabad           |
|        | State of Palestine | Jerusalem           |
|        | Philippines        | Manila              |
|        | Qatar              | Doha                |
|        | Saudi Arabia       | Riyadh              |
|        | Singapore          | Singapore           |
|        | Syria              | Damascus            |

Table 4 – continued from previous page

| Region | Capital                | State              |
|--------|------------------------|--------------------|
|        | Tajikistan             | Dushanbe           |
|        | Thailand               | Bangkok            |
|        | Turkey                 | Ankara             |
|        | Turkmenistan           | Ashgabat           |
|        | United Arab Emirates   | Abu Dhabi          |
|        | Uzbekistan             | Tashkent           |
|        | Vietnam                | Hanoi              |
|        | Albania                | Tirana             |
|        | Andorra                | Andorra la Vella   |
|        | Austria                | Vienna             |
|        | Belarus                | Minsk              |
|        | Belgium                | Brussels           |
|        | Bosnia and Herzegovina | Sarajevo           |
|        | Bulgaria               | Sofia              |
|        | Croatia                | Zagreb             |
|        | Czech Republic         | Prague             |
|        | Denmark                | Copenhagen         |
|        | Estonia                | Tallinn            |
|        | Finland                | Helsinki           |
|        | France                 | Paris              |
|        | Germany                | Berlin             |
|        | Greece                 | Athens             |
|        | Hungary                | Budapest           |
|        | Iceland                | Reykjavík          |
|        | Republic of Ireland    | Dublin             |
|        | Italy                  | Rome               |
|        | Latvia                 | Riga               |
| Europe | Liechtenstein          | Vaduz              |
|        | Lithuania              | Vilnius            |
|        | Luxembourg             | Luxembourg         |
|        | Republic of Macedonia  | Skopje             |
|        | Malta                  | Valletta           |
|        | Monaco                 | Monaco             |
|        | Montenegro             | Podgorica          |
|        | Norway                 | Oslo               |
|        | Poland                 | Warsaw             |
|        | Portugal               | Lisbon             |
|        | Romania                | Bucharest          |
|        | Russia                 | Moscow             |
|        | San Marino             | City of San Marino |
|        | Serbia                 | Belgrade           |
|        | Slovakia               | Bratislava         |
|        | Slovenia               | Ljubljana          |
|        | Spain                  | Madrid             |
|        | Sweden                 | Stockholm          |
|        | Switzerland            | Bern               |



Table 4 – continued from previous page

| Region                           | Capital                        | State               |
|----------------------------------|--------------------------------|---------------------|
|                                  | Ukraine                        | Kiev                |
|                                  | United Kingdom                 | London              |
|                                  | Vatican City                   | Vatican City        |
| North America                    | Antigua and Barbuda            | St.Johns            |
|                                  | Bahamas                        | Nassau Bahamas      |
|                                  | Barbados                       | Bridgetown          |
|                                  | Belize                         | Belmopan            |
|                                  | Canada                         | Ottawa              |
|                                  | Costa Rica                     | San José Costa Rica |
|                                  | Cuba                           | Havana              |
|                                  | Dominica                       | Roseau              |
|                                  | Dominican Republic             | Santo Domingo       |
|                                  | El Salvador                    | San Salvador        |
|                                  | Guatemala                      | Guatemala City      |
|                                  | Haiti                          | Port-au-Prince      |
|                                  | Honduras                       | Tegucigalpa         |
|                                  | Jamaica                        | Kingston Jamaica    |
|                                  | Mexico                         | Mexico City         |
|                                  | Kingdom of the Netherlands     | Amsterdam           |
|                                  | Nicaragua                      | Managua             |
| Panama                           | Panama City                    |                     |
| Saint Kitts and Nevis            | Basseterre                     |                     |
| Saint Lucia                      | Castries                       |                     |
| Saint Vincent and the Grenadines | Kingstown                      |                     |
| Trinidad and Tobago              | Port of Spain                  |                     |
| United States                    | Washington D.C.                |                     |
| Oceania                          | Australia                      | Canberra            |
|                                  | Fiji                           | Suva                |
|                                  | Kiribati                       | South Tarawa        |
|                                  | Marshall Islands               | Majuro              |
|                                  | Federated States of Micronesia | Palikir             |
|                                  | New Zealand                    | Wellington          |
|                                  | Papua New Guinea               | Port Moresby        |
|                                  | Samoa                          | Apia                |
|                                  | Solomon Islands                | Honiara             |
|                                  | Tonga                          | Nuku'alofa          |
| Tuvalu                           | Funafuti                       |                     |
| Vanuatu                          | Port Vila                      |                     |
| South America                    | Argentina                      | Buenos Aires        |
|                                  | Bolivia                        | Sucre               |
|                                  | Brazil                         | Brasília            |
|                                  | Chile                          | Santiago            |
|                                  | Colombia                       | Bogotá              |
|                                  | Ecuador                        | Quito               |
| Guyana                           | Georgetown Guyana              |                     |

Table 4 – continued from previous page

| Region | Capital   | State      |
|--------|-----------|------------|
|        | Paraguay  | Asunción   |
|        | Peru      | Lima       |
|        | Suriname  | Paramaribo |
|        | Uruguay   | Montevideo |
|        | Venezuela | Caracas    |

## List of ideologies

1981 Irish hunger strike; 9/11 Truth movement; Abertzale; Abolished monarchy; African nationalism; African socialism; Afrikaner nationalism; Agorism; Agrarianism; Agrarian socialism; Ahlus Sunnah wal Jamaah (organisation); Albanians in the Republic of Macedonia; Alexander Lukashenko; Algeria; Algerianism; Alsace; Alter-globalization; American nationalism; Anarchism; Anarchist communism; Anarcho-capitalism; Anarcho-syndicalism; Andalusian nationalism; Anglo-Irish Treaty; Anglophile; Animal rights; Animal welfare; Anti; Anti-Americanism; Anti-capitalism; Anti-Catholicism in the United Kingdom; Anti-clericalism; Anti-communism; Anti Communism; Anti-corporate activism; Anti-Corruption; Anti-Esotericism; Anti-fascism; Anti-Federalism; Antifeminism; Anti-globalization movement; Anti-imperialism; Anti-Islamism; Anti-Judaism; Anti-Leninism; Anti-LGBT; Anti-liberal; Antimilitarism; Anti-nationalism; Anti-Polish sentiment; Anti-Revisionism; Antisemitism; Anti-Sovietism; Anti-Stalinist left; Anti-statism; Anti-taxation; Anti-war movement; Antiziganism; Anti-Zionism; António Ramalho Eanes; Apartheid in South Africa; Arab citizens of Israel; Arab nationalism; Arab socialism; Aragon; Armenian nationalism; Assyrian nationalism; Austrofascism; Authoritarianism; Autonomism; Awoism; Azerbaijani nationalism; Ba'athism; Balanced budget; Baloch nationalism; Bangladeshi nationalism; Basque nationalism; Bavaria; Bavarian independence; Bavarian Regionalism; Beauty; Beijing; Belarus; Bengali nationalism; Berberism; Berber people; Beta Israel; Big tent; Black Consciousness Movement; Black nationalism; Black supremacy; Bolivarianism; Bolivarian Revolution; Bolivia; Bosniaks; Bosnianism; Brahmin; Breton nationalism; Breton people; British Empire; British Fascism; British nationalism; Buddhism; Buddhist socialism; Bulgaria; Burmese Way to Socialism; Business; Caliphate; Cambodia; Canadian nationalism; Canarian nationalism; Cantonalism; Capitalism; Carinthian Slovenes; Castilian nationalism; Castroism; Catalan nationalism; Catalan separatism; Catholic Church; Catholic social teaching; Centralisation; Central Powers; Centre-left; Centre-right; Centrism; Chaldean Christians; Cham issue; Cham people (Asia); Chardal; Chavismo; Chinese nationalism; Chinese reunification; Chinese socialism; Christian communism; Christian democracy; Christian ethics; Christian humanism; Christianity; Christian left; Christian right; Christian socialism; Citizenship; Civil and political rights; Civil liberties; Classical liberalism; Classical Marxism; Clerical fascism; Clericalism; Colonialism; Communism; Communist Party of China; Communitarianism; Community politics; Conflict management; Congress of Verona (1943); Conservatism; Conservatism in Australia; Conservatism in Canada; Conservatism in Germany; Conservatism in the United States; Conservative Democrat; Conservative liberalism; Constitutionalism; Constitutional monarchy; Consumerism; Consumer protection; Cooperative; Co-operative economics; Cooperative federalism; Copyright; Cornerstone Group; Cornish Assembly; Cornish Autonomy; Cornish nationalism; Corporatism; Corsican nationalism; Cosmopolitanism; Côte d'Ivoire; Council communism; Creationism; Criticism of Islam; Croatian nationalism; Croats of Boka Kotorska; Croats of Vojvodina; Cultural conservatism; Cultural liberalism; Danish Realm; Decentralization; Decolonization; Degar; Degrowth; Demarchy; Democracy; Democratic liberalism; Democratic security; Democratic socialism; Democratic Struggle; Democratization; Deng Xiaoping Theory; Departments of Bolivia; Developmentalism; Development criticism; Devizes; Devolution; Devolved English parliament; Dictatorship of the proletariat; Direct democracy; Direct rule; Disputed status of Gibraltar; Distributism; Doi Moi; Dominant minority; Dominionism; Drug policy reform; Druze; Early Malay nationalism; Eastern Orthodox Church; Ecology; Ecology movement; Economic liberalism; Economic nationalism; Economic rationalism; Eco-socialism; Eco-sociality; E-democracy; Education; Egalitarianism; Egyptian nationalism; Éire Nua; Electoral reform; Electoral reform in New Zealand; Elitism; English independence; English nationalism; Environmentalism; Equal justice under law; Equal opportunity; Equal rights; Eritrea; Especifismo; Ethnic-minority; Ethnic nationalism; Ethnocentrism; Ethnopluralism; Eurasianism; Euro; Eurocommunism; European integration; European People's Party; Euroscepticism; Expansionism; Experimental projects; Factions in the Democratic Party (United States); Fair trade; Falangism; Family values; Far-left politics; Faroe Islands; Far right in the United Kingdom; Far-right politics; Fascism; Fathers' rights movement; Federalism; Federalism in China; Federalist; Federation;

Feminism; Feudalism; Filipino nationalism; Finland; Fiscal conservatism; Fiscal federalism; Flemish Movement; Fourth International Posadist; Francisco de Sá Carneiro; Francoist Spain; Francophile; Francophone; Franjo Tuđman; Freedom of information; Freedom of speech; Free love; Free market; Free trade; French Community of Belgium; French First Republic; French nationalism; Friesland; Frivolous political party; Fujimorism; Fundamentalism; Gaels; Gag rule; Galicianism (Galicia); Galician nationalism; Gaullism; Georgism; Gerald Götting; German Emperor; German language; German nationalism; Good governance; Goulash Communism; Grassroots; Grassroots democracy; Greater Armenia (political concept); Greater Israel; Greater Somalia; Greek nationalism; Green anarchism; Green conservatism; Greenland; Green liberalism; Green libertarianism; Green party; Green politics; Gross national happiness; Guerrilla warfare; Guevarism; Gwynedd; Halakha; Haredi Judaism; Harm reduction; Hazara people; Hindutva; Ho Chi Minh Thought; Holism; Honduras; House of Grimaldi; Hoxhaism; Hugo Chávez; Humanism; Humanist Movement; Human rights; Hungarian nationalism; Hungarians in Romania; Hungarians in Slovakia; Husakism; Hutu Power; Idealism; Imperial Preference; Impossibilism; Independence; Independent (politician); Indian nationalism; Indigenism; Indigenous rights; Individualism; Industrialisation; Integral humanism; Integralism; Intellectual property; Internal resistance to South African apartheid; Internationalism; Internationalism (politics); International Socialist Tendency; Internet censorship; Iranian nationalism; Iranian reform movement; Iraqi nationalism; Iraqi Turkmens; Irish nationalism; Irish republicanism; Iron Guard; Islam; Islamic democracy; Islamic fundamentalism; Islamic republic; Islamism; Islamophobia; Isolationism; Israeli–Palestinian conflict; Istria; Italian nationalism; Italy–Malta relations; Ivoirité; Jadid; James Madison; Japanese militarism; Japanese nationalism; J. B. Danquah; Jeffersonian democracy; Juche; Justice; Justicialist Party; Kahanism; Katarismo; Kemalist ideology; Ketuanan Melayu; Keynesian economics; Kham; Khatim an-Nabuwwah; Khmer people; Kidderminster; Kirchnerism; Korean nationalism; Kuomintang; Kurdish nationalism; Kurdish people; Kwame Nkrumah; Kyrgyz nationalism; Laborer; Labor rights; Labor Zionism; Labour movement; Laïcité; Laissez-faire; Land of Israel; Latvia; Latvian people; Law and order (politics); Lebanese nationalism; Left centrism; Left communism; Left-libertarianism; Left-right politics; Left-wing nationalism; Left-wing politics; Legality of cannabis; Leninism; Liberal conservatism; Liberal democracy; Liberalism; Liberalism in Australia; Liberalism in Colombia; Liberalism in South Korea; Liberalism in the United States; Liberal movements within Islam; Liberal nationalism; Liberal socialism; Liberation theology; Liberism; Libertarian conservatism; Libertarian Democrat; Libertarianism; Libertarian Marxism; Libertarian socialism; Lieberman Plan; Lists of active separatist movements; Lithuania; Localism; Localism (politics); Luxemburgism; Macedonian nationalism; Malta–United Kingdom relations; Maltese; Maoism; Market liberalism; Market socialism; Martinique; Marxism; Marxism–Leninism; Masculism; Mass politics; Megali Idea; Metaxism; Microeconomic reform; Militant; Militarism; Millî Görüş; Minarchism; Minority rights; Miratism; Mixed economy; Mizrahi Jews; Mobutism; Moderate; Moderate Islamism; Moderation; Modernization; Modern Orthodox Judaism; Monarchism; Monarchy; Monarchy of Australia; Monetary reform; Montenegrin nationalism; Morality; Moravism; Morocco; Movement for the unification of Romania and Moldova; Multiculturalism; Multiethnic society; Muslim; Nacionalismo (Argentine political movement); Naga Nationalism; Nasserism; National Bolshevism; National Catholicism; National communism; National conservatism; Nationalism; Nationalization; National liberalism; National Liberation (historical); National Reconciliation; National syndicalism; Nativism (politics); Natural Capitalism: Creating the Next Industrial Revolution; Nazism; Neocolonialism; Neoconservatism; Neoconservatism (disambiguation); Neo-fascism; Neoliberalism; Neo-Nazism; Netherlands; Network neutrality; Neutrality (international relations); Nevis; New Democrats; New Left; New Nationalism; New Right; None of the above; Non-interventionism; Nonpartisan; Nonsectarian; Nonviolence; Non-violent resistance; Non-voting; Nordic agrarian parties; Norse religion; Norwegian romantic nationalism; Objectivism (Ayn Rand); One country, two systems; One nation conservatism; Open government; Opposition (politics); Opposition to immigration; Oromo people; Pacifism; Pakistani nationalism; Paleoconservatism; Paleolibertarianism; Palestinian nationalism; Palestinian sovereignty; Pan-Africanism;

Panama; Pan-Americanism; Pan-Arabism; Pañcasāla; Pancasila (politics); Pan-European identity; Pan-European nationalism; Pan-Germanism; Pan-Iranism; Pan-Islamic awakening; Pan-Islamism; Pan-Latin Americanism; Pan-Slavism; Pan-Turkism; Paraguay; Parliamentary system; Participatory democracy; Participatory politics; Partition of Belgium; Pashtun people; Patent; Patriotism; Peace; Peace movement; Pensioner; Pensioners' Party; People of Ethiopia; Peronism; Personalism; Peru; Peter Kropotkin; Pim Fortuyn; Pim Fortuyn List; Platformism; Pochvennichestvo; Poles in Lithuania; Political corruption; Political freedom; Political parties of minorities; Political positions of David Cameron; Political radicalism; Political satire; Politics of Israel; Popolarismo; Popular front; Popular Socialism; Populism; Portuguese nationalism; Portuguese people; Pragmatism; Presentation program; President of the United States; President of Ukraine; Privacy; Pro-Europeanism; Progressive Christianity; Progressive Democrats of America; Progressivism; Progressivism in the United States; Protectionism; Protest; Protestantism; Protest vote; Proto-fascism; Proxy voting; Publicly funded health care; Puerto Rican independence movement; Quebec sovereignty movement; Qutbism; Racialism; Radical; Radicalism (historical); Rakhine people; Rankovićism; Redistribution of wealth; Reform; Reformism; Reform movement; Regional development; Regionalism (politics); Regions of Ethiopia; Reintegrationism; Religion; Religious denomination; Religious nationalism; Religious Zionism; Republicanism; Republicanism in Australia; Republicanism in New Zealand; Republicanism in the United Kingdom; Republicanism in the United States; Revisionism (Marxism); Revisionist Zionism; Revolutionary socialism; Rhodesia; Right-libertarianism; Rights; Right-wing politics; Right-wing populism; Royalist; Ruhollah Khomeini; Rule of law; Russia; Russian immigration to Israel in the 1990s; Russian nationalism; Russians in Estonia; Russians in Latvia; Russians in Lithuania; Russo-centrism; Russophilia; Sahrawi people; Salafi; Sami people; Sandinismo; Satire; Savoy; Scientific development concept; Scientific socialism; Scottish independence; Scottish Labour Party; Scottish national identity; Scottish nationalism; Secluarism; Secular humanism; Secularism; Secularism in Pakistan; Secularity; Self-determination; Senior citizen; Separatism; Sephardic Haredim; Serbia; Serbian–Montenegrin unionism; Serbian nationalism; Serbian progressivism; Serbs of Montenegro; Sex-positive movement; Shia Islam; Sindhi nationalism; Single-issue politics; Sinhalese Buddhist nationalism; Slavic nationalism; Slavonia; Slovaks; Slovenian nationalism; Small government; Social change; Social conservatism; Social Conservatism; Social conservatism in the United States; Social corporatism; Social Credit; Social democracy; Social ecology; Social humanism; Social Individualism; Socialism; Socialism and Islam; Socialism of the 21st century; Socialist economics; Socialist feminism; Social Justice; Social justice; Social liberalism; Social market economy; Social republicanism; Social sphere; Solidarism; Somalia; Songun; South Africa; South Sudan; Souverainism; Sovereignty; Spain; Spanish nationalism; Spiritualism; Spirituality; Sri Lankan Tamil nationalism; Stalinism; State Peace and Development Council; State Shinto; States' rights; Statism; Statism in Shōwa Japan; Strasserism; Structuralism; Sudan; Šumadija; Sunni Islam; Sunshine Policy; Sustainable development; Sweden; Swedish-speaking Finns; Syncretic politics; Syndicalism; Syrian nationalism; Syrmia; Szeged Idea; Taiwanese nationalism; Taiwan independence; Taiwanization; Tamil nationalism; Technocracy; Temperance movement; Tertium quids; Thatcherism; Third camp; Third Position; Third Way; Third Way (centrism); Third Way (United Kingdom); Three Principles of the People; Three Represents; Tigray-Tigrinya people; Titoism; Torah; Trade union; Traditionalism; Traditionalist conservatism; Transcendental Meditation; Transnistria; Transparency (behavior); Treaty of Lisbon; Tribalism; Triple Entente; Tripuri nationalism; Trotskyism; Truth and reconciliation commission; Turkic nationalism; Turkish nationalism; Two-Nation Theory; Two-state-solution; Ujamaa; Ukrainian nationalism; Ulster loyalism; Ulster nationalism; Ultramontanism; Unification Church; Unilateral Declaration of Independence; Unionism in Ireland; Unionism in Scotland; Unionism in the United Kingdom; Union of European Federalists; Union State; Unitarisation; United Ireland; United States Congress; Urban design; Uribism; Uruguay; Uzbekistan; Valencian nationalism; Venetian nationalism; Venizelism; Vietnam; Vojvodina; Völkisch movement; Volksgemeinschaft; Voluntaryism; Walloon Movement; Warsaw; Wars of national liberation; Weapons Rights; Welfare; Welfare State; Welsh independence; Welsh nationalism; Wessex; Western conservatism; Western

world; Whiggism; White nationalism; White separatism; White supremacy; Solidarity; Women's rights; Workerism; Xenophobia; Yalkut Yosef; Youth rights; Zionism; Zulu people.
